# Supplementary material
Source: PubMed Central journal article supplement (PMC8169942)
Supplement: 41422_2020_431_MOESM1_ESM.pdf [file 41422_2020_431_MOESM1_ESM.pdf]

**Figure S1**

**a**

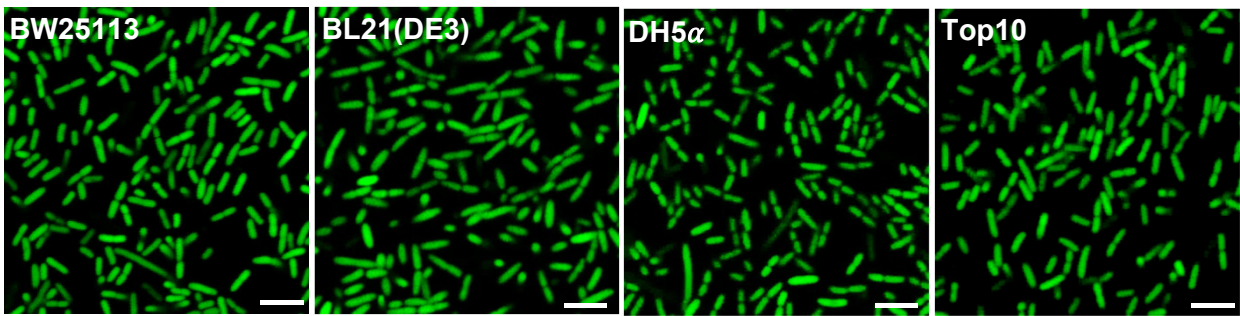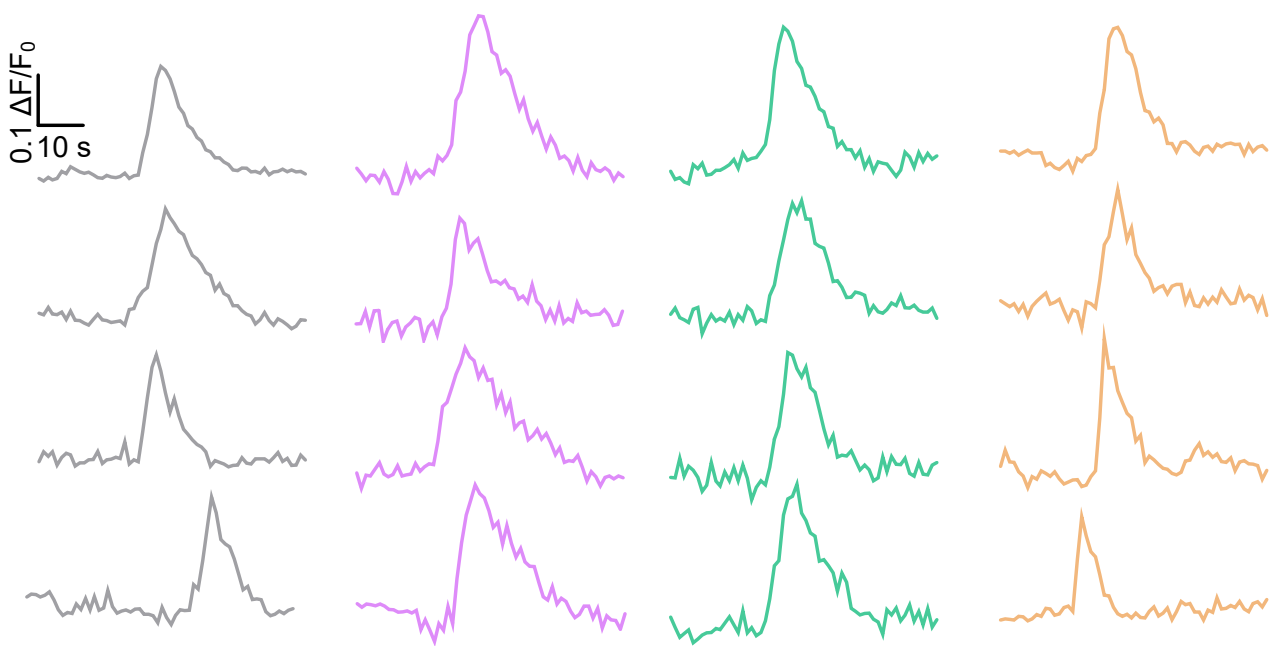

**b**

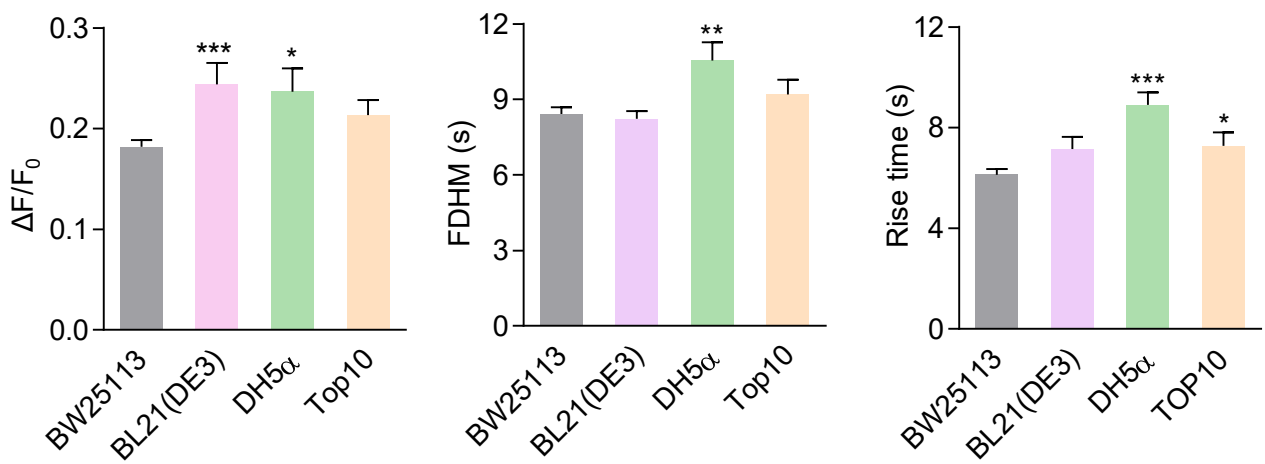

**Figure S1. Spontaneous BacFlash activity in different *E. coli* strains.**

(a) Confocal images of four *E. coli* strains expressing pHluorin. Scale bar: 5  $\mu\text{m}$ . Representative traces of BacFlashes in M9 minimal medium are shown beneath the respective images.

(b) Properties of BacFlashes in different *E. coli* strains.  $\Delta F/F_0$ , amplitude expressed as peak increase in fluorescence normalized by the basal fluorescence signal ( $F_0$ ); FDHM, full duration at half maximum; and rise time, time from onset to the peak increase of fluorescence. Data are mean  $\pm$  sem. n = 26 - 174 events from 17 - 27 image stacks per group. \* $p < 0.05$ , \*\* $p < 0.01$ , \*\*\* $p < 0.001$  versus BW25113 group.
