# Supplementary material
Source: PubMed Central journal article supplement (PMC8169942)
Supplement: 41422_2020_431_MOESM2_ESM.pdf [file 41422_2020_431_MOESM2_ESM.pdf]

## Figure S2

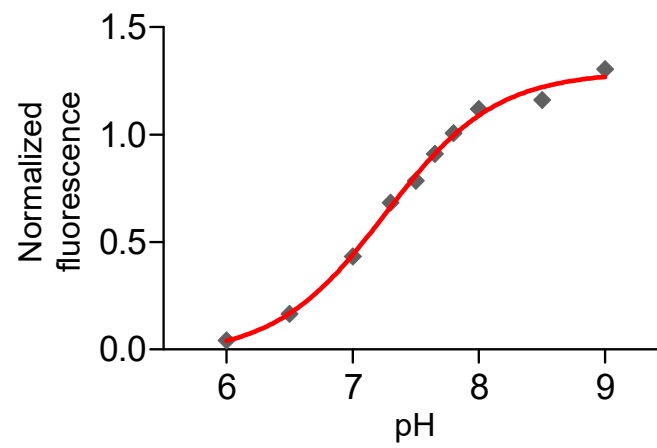

**Figure S2. Calibration of the pH indicator pHLuorin in *E. coli* cells.** *E. coli* cells expressing pHLuorin imaged in M9 minimal medium with its pH adjusted from 6.0 to 9.0 using HCl or NaOH. CCCP at 200  $\mu$ M was used to collapse the transmembrane pH gradient. Normalized pHLuorin fluorescence intensity at different pH fitted to a Hill equation, yielding a pK<sub>a</sub> of 7.26 and a Hill coefficient of 1.0. Data are mean  $\pm$  sem. n = 11 - 12 image stacks in 2 independent experiments for each data point.
