# Supplementary material
Source: PubMed Central journal article supplement (PMC8169942)
Supplement: 41422_2020_431_MOESM3_ESM.pdf [file 41422_2020_431_MOESM3_ESM.pdf]

## Figure S3

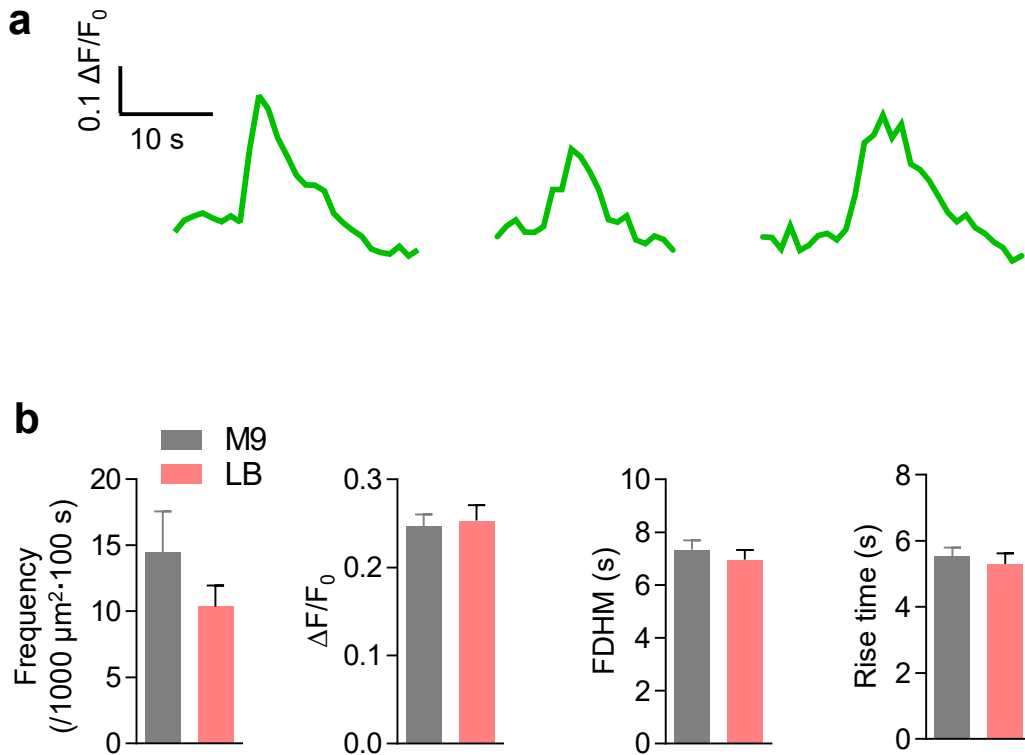

### Figure S3. Comparative BacFlash activity of BW25113 cells bathed in LB and M9 medium.

(a) Representative traces of BacFlashes of BW25113 cells bathed in LB medium.

(b) Frequency and properties of BacFlashes of BW25113 cells bathed in LB and M9 medium.  $\Delta F/F_0$ , amplitude expressed as peak increase in fluorescence normalized by the basal fluorescence signal ( $F_0$ ); FDHM, full duration at half maximum; and rise time, time from onset to the peak increase of fluorescence. Data are mean  $\pm$  sem.  $n = 87$ -104 events from 6 image stacks per group.
