# Supplementary material
Source: PubMed Central journal article supplement (PMC8169942)
Supplement: 41422_2020_431_MOESM4_ESM.pdf [file 41422_2020_431_MOESM4_ESM.pdf]

## Figure S4

a

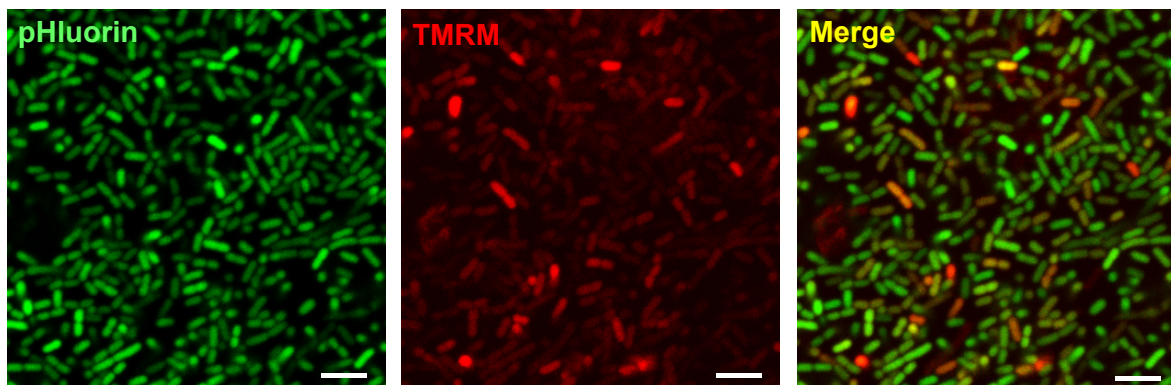

b

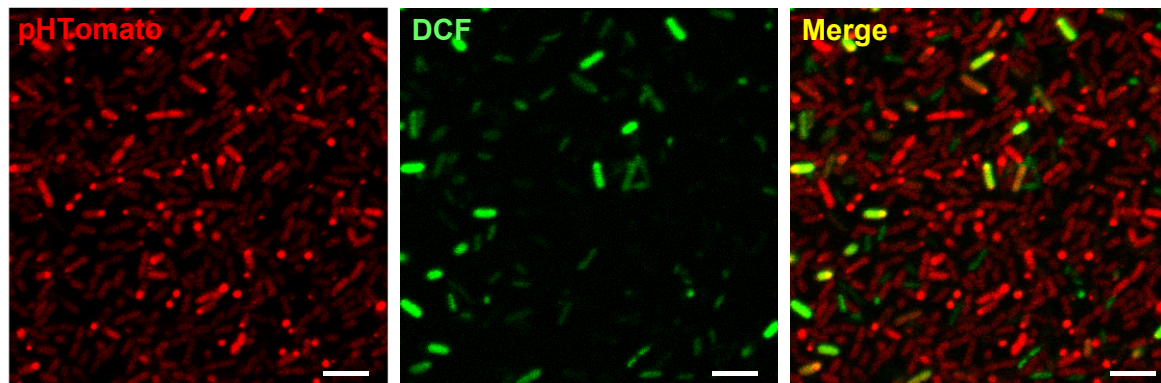

### Figure S4. Concurrent membrane depolarization, ROS bursts, and $\text{pH}_i$ transients in BacFlashes.

(a) Simultaneous confocal imaging of pHluorin and TMRM fluorescence signals in intact *E. coli* cells. Scale bars: 5  $\mu\text{m}$ . Note that only a proportion of cells was successfully stained with TMRM.

(b) Simultaneous confocal imaging of pHTomato and DCF fluorescence signals in intact *E. coli* cells. Scale bars: 5  $\mu\text{m}$ . Note that only a proportion of cells was successfully stained with DCF.
