# Supplementary material
Source: PubMed Central journal article supplement (PMC8169942)
Supplement: 41422_2020_431_MOESM5_ESM.pdf [file 41422_2020_431_MOESM5_ESM.pdf]

## Figure S5

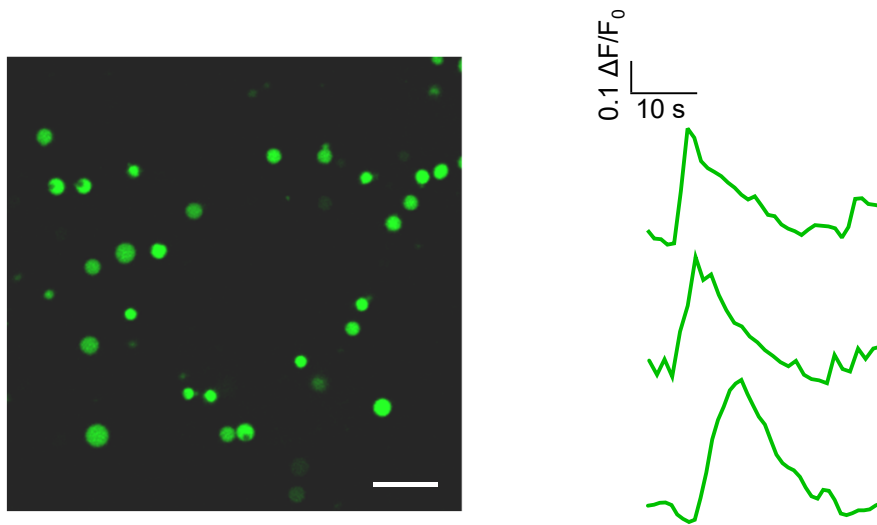

### **Figure S5. BacFlashes in *E. coli* spheroplasts free of cell walls.**

Left: confocal images of *E. coli* spheroplasts after the cell wall was depleted by lysozyme and EDTA. Scale bar: 5  $\mu\text{m}$ .

Right: Representative traces of pHluorin-reported BacFlashes in *E. coli* spheroplasts.
