# Supplementary material
Source: PubMed Central journal article supplement (PMC8169942)
Supplement: 41422_2020_431_MOESM6_ESM.pdf [file 41422_2020_431_MOESM6_ESM.pdf]

## Figure S6

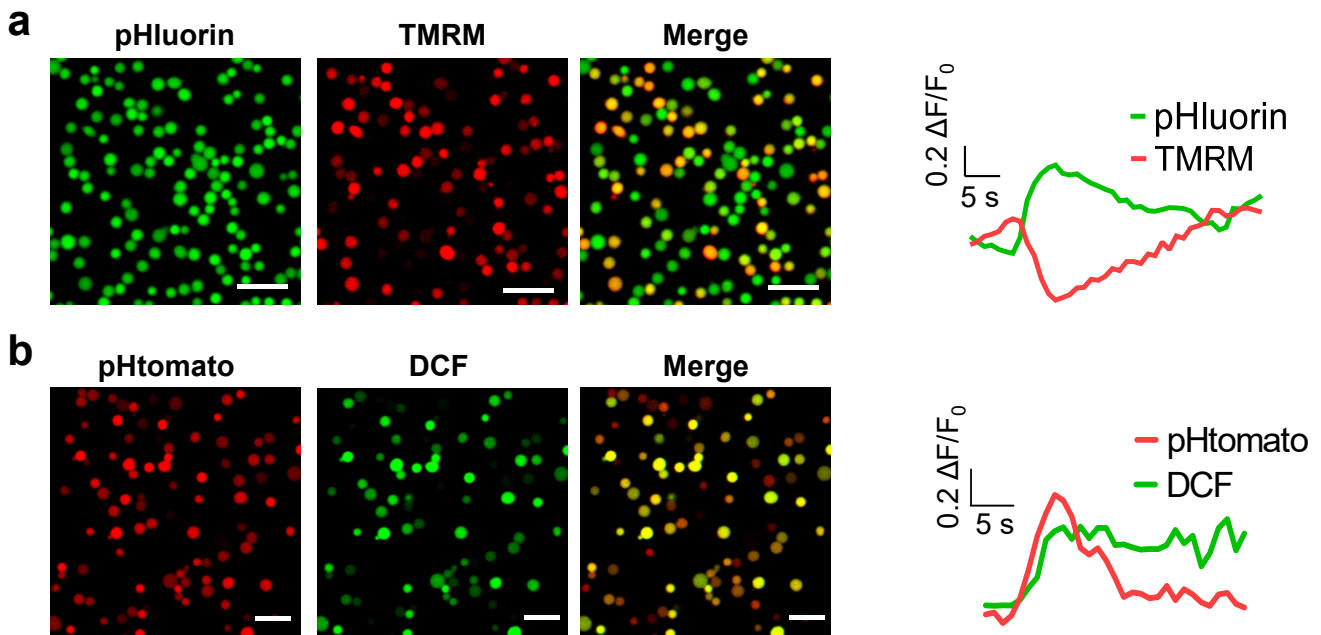

### Figure S6. Concurrent membrane depolarization, ROS bursts, and $\text{pH}_i$ transients in BacFlashes detected in *E.coli* spheroplasts .

(a) Left: simultaneous confocal imaging of pHluorin and TMRM fluorescence signals in spheroplasts. Scale bars: 10  $\mu\text{m}$ . Note that most of the spheroplasts (80%) were successfully stained with TMRM.

Right: representative traces of TMRM-reported membrane depolarization and pHluorin-reported  $\text{pH}_i$  alkalization.

(b) Left: simultaneous confocal imaging of pHtomato and DCF fluorescence signals in spheroplasts. Scale bars: 10  $\mu\text{m}$ . Note that a major part of the spheroplast (65%) were successfully stained with DCF.

Right: representative traces of pHtomato-reported  $\text{pH}_i$  alkalization and DCF-reported ROS burst.
