# Supplementary material
Source: PubMed Central journal article supplement (PMC8169942)
Supplement: 41422_2020_431_MOESM7_ESM.pdf [file 41422_2020_431_MOESM7_ESM.pdf]

## Figure S7

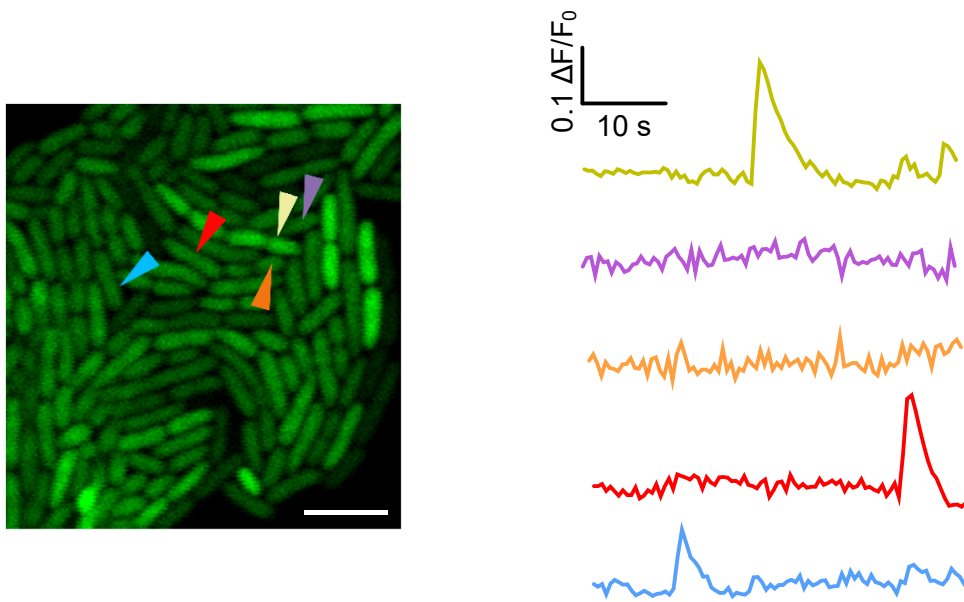

### Figure S7. BacFlashes in *E. coli* colonies growing on agarose pad.

Left: confocal image of a single layer of an *E. coli* colony growing on an agarose pad. Scale bar: 5  $\mu\text{m}$ .

Right: representative traces of pHluorin-reported BacFlashes in cells marked by arrowheads in the left panel. Traces and cells are matched by color. Note that BacFlashes do not propagate into neighboring cells.
