# Supplementary material
Source: PubMed Central journal article supplement (PMC8169942)
Supplement: 41422_2020_431_MOESM8_ESM.pdf [file 41422_2020_431_MOESM8_ESM.pdf]

## Figure S8

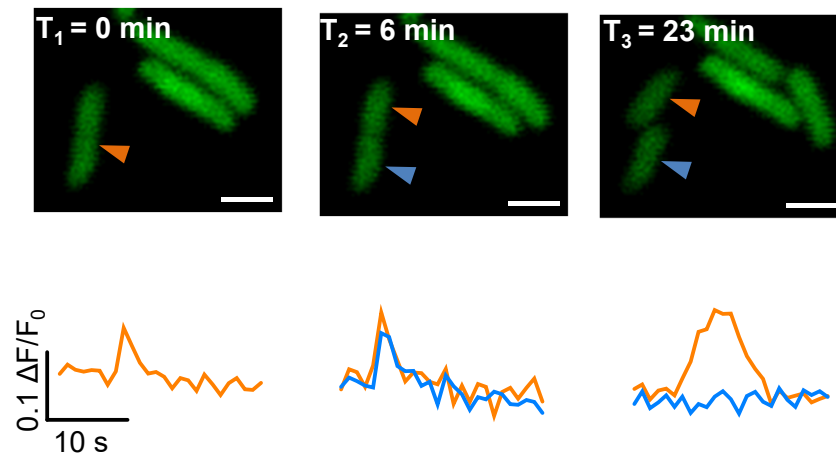

### Figure S8. BacFlashes in dividing *E. coli* cells.

Traces showing BacFlashes occurring before, during, and after cell division in parent and daughter cells marked by arrowheads. Traces and cells are matched by color. Scale bar: 2  $\mu\text{m}$ .
