# Supplementary material
Source: PubMed Central journal article supplement (PMC8169942)
Supplement: 41422_2020_431_MOESM9_ESM.pdf [file 41422_2020_431_MOESM9_ESM.pdf]

## Figure S9

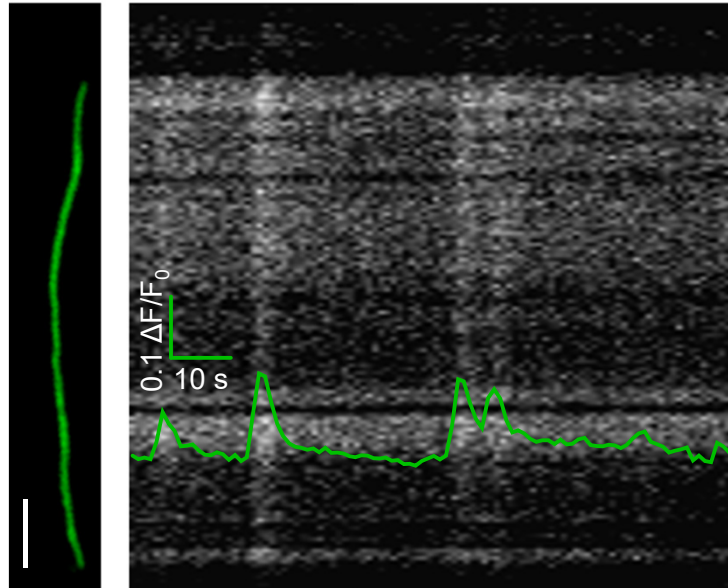

**Figure S9. Spatial synchrony of BacFlashes in filamentous *E. coli* cells.** Left: confocal image of a filamentous *E. coli* cell expressing pHluorin. Cell division was inhibited by cephalixin treatment. Scale bar: 5  $\mu\text{m}$ . Right: kymograph of fluorescence intensity along the length of a cell. Note that repetitive BacFlashes occurred synchronously over several tens of microns. Overlay (green) shows spatially averaged fluorescence intensity.
