# Supplementary material
Source: PubMed Central journal article supplement (PMC8169942)
Supplement: 41422_2020_431_MOESM10_ESM.pdf [file 41422_2020_431_MOESM10_ESM.pdf]

## Figure S10

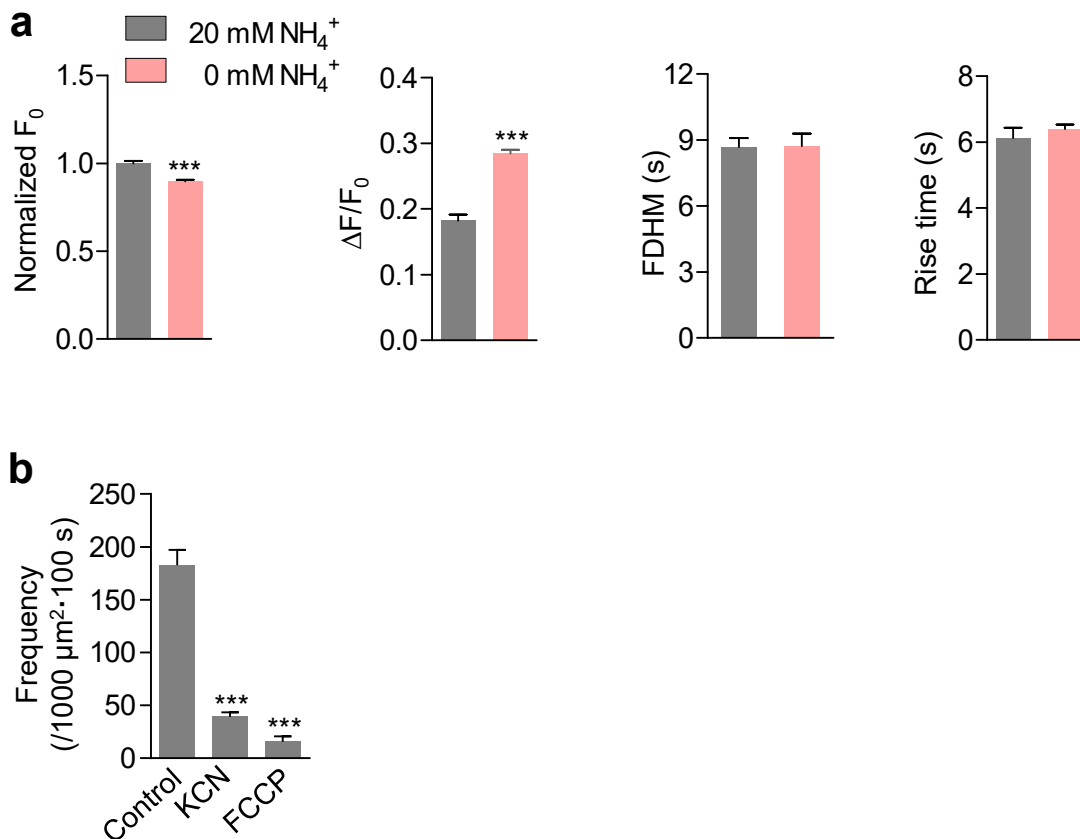

### Figure S10. Properties of BacFlashes in the presence or absence of ammonium.

(a) Characteristics of BacFlashes in M9 minimal medium with and without ammonium.  $F_0$ , basal fluorescence intensity of pHluorin;  $\Delta F/F_0$ , amplitude expressed as peak increase of fluorescence normalized by  $F_0$ ; FDHM, full duration at half maximum; and rise time, time from onset to peak increase of fluorescence. Data are mean  $\pm$  sem.  $n = 54 - 1035$  events from 12 - 26 image stacks per group. \*\*\* $p < 0.001$  versus 20 mM ammonium group.

(b) Sensitivity of BacFlashes to ETC blocker (5 mM KCN for complex IV) and uncoupler (10  $\mu$ M FCCP) in ammonium-free M9 minimal medium. Data are mean  $\pm$  sem.  $n = 7 - 42$  image stacks per group. \*\*\* $p < 0.001$  versus control group.
