# Supplementary material
Source: PubMed Central journal article supplement (PMC8169942)
Supplement: 41422_2020_431_MOESM11_ESM.pdf [file 41422_2020_431_MOESM11_ESM.pdf]

## Figure S11

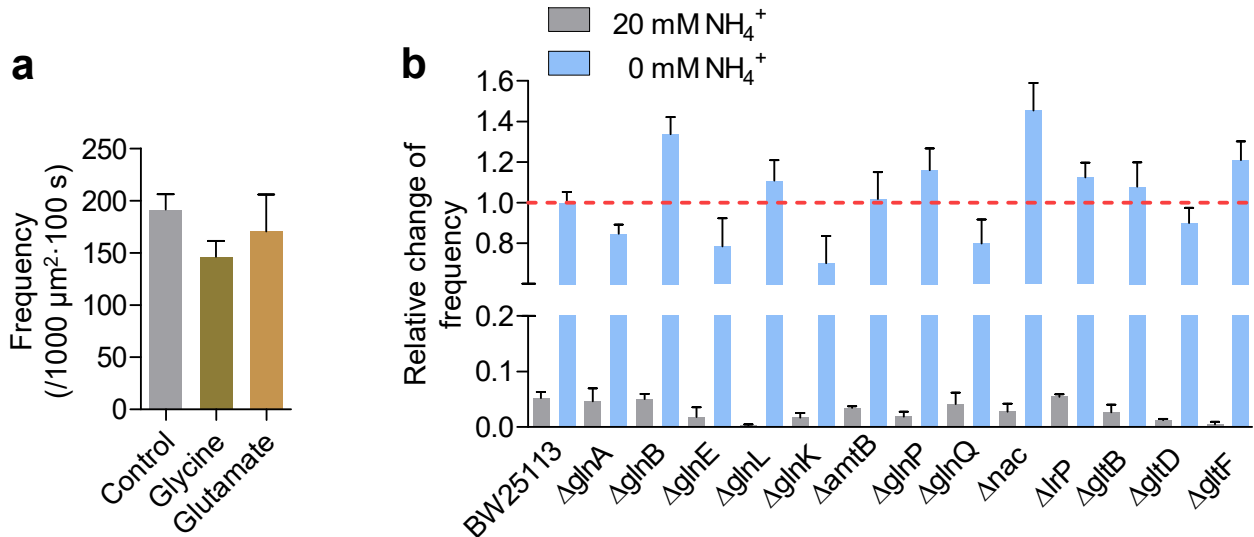

### Figure S11. Ammonium inhibition of BacFlash activity was unrelated to nitrogen metabolism.

(a) Substituting ammonium with equimolar glycine or glutamate as a nitrogen source was unable to suppress the BacFlash hyperactivity in ammonium-free M9 minimal medium. Data are mean  $\pm$  sem.  $n = 6 - 17$  image stacks per group.

(b) Ammonium inhibition of BacFlashes was unaltered in the 13 ammonia metabolic gene knockout mutants examined. BacFlash frequency in each mutant was normalized to frequency of wild type BW25113. Data are mean  $\pm$  sem.  $n = 3 - 31$  image stacks per group.
