# Supplementary material
Source: PubMed Central journal article supplement (PMC8169942)
Supplement: 41422_2020_431_MOESM12_ESM.pdf [file 41422_2020_431_MOESM12_ESM.pdf]

## Figure S12

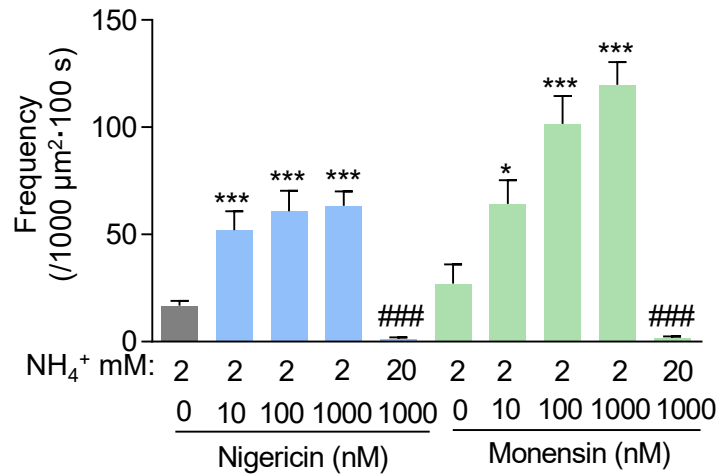

**Figure S12. Concentration-dependent triggering of BacFlashes by nigericin and monensin in the spheroplasts.** Data are mean  $\pm$  sem.  $n = 18$ - $31$  image stacks per group. \* $p < 0.05$ , \*\*\* $p < 0.001$  versus respective control group. ### $p < 0.001$  versus 100  $\mu$ M nigericin or monensin group.
