# Supplementary material
Source: PubMed Central journal article supplement (PMC8169942)
Supplement: 41422_2020_431_MOESM13_ESM.pdf [file 41422_2020_431_MOESM13_ESM.pdf]

**Figure S13**

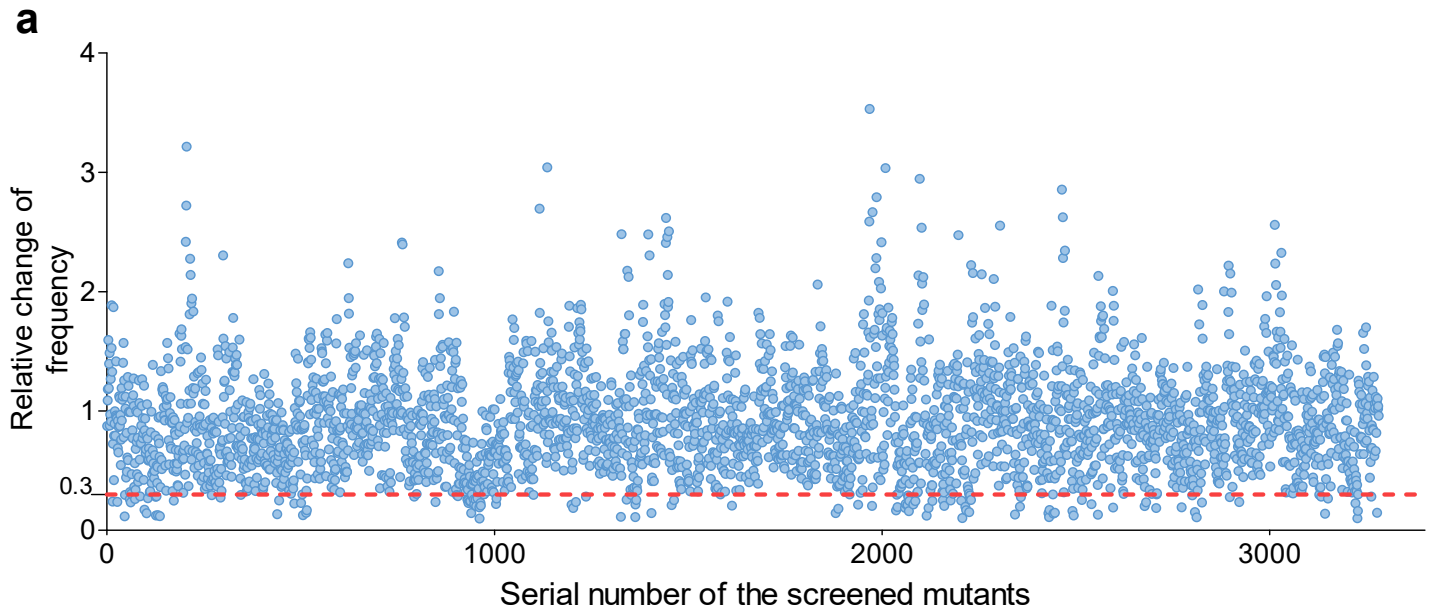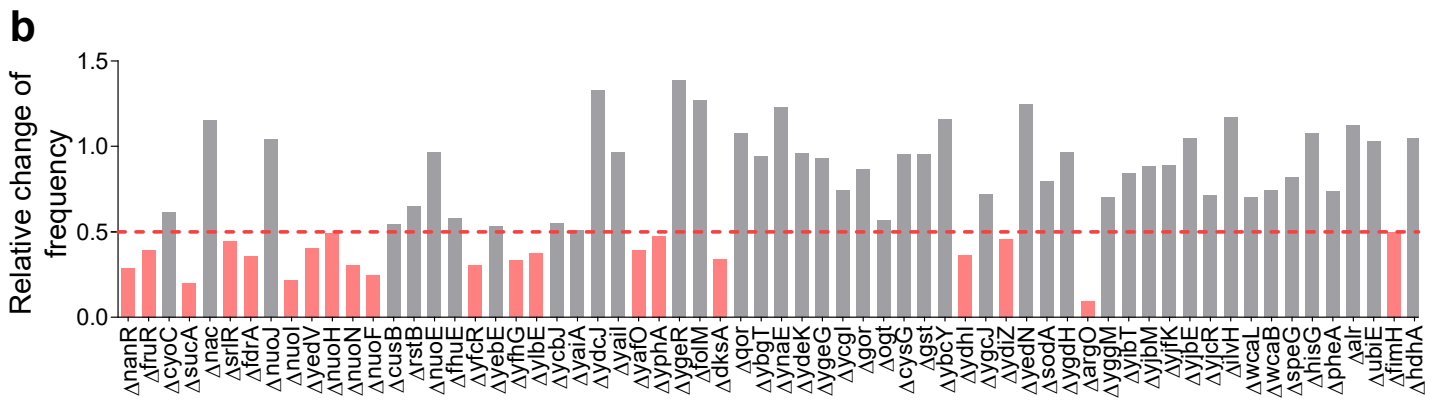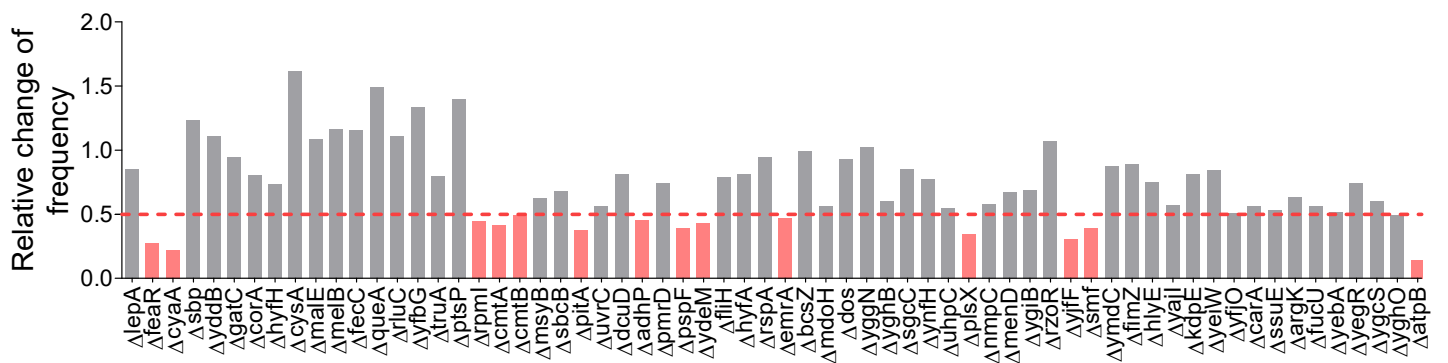

**Figure S13. Whole-genome screening for regulators of BacFlash biogenesis.**

(a) Results for BacFlash frequency in the first-round screening. The BacFlash frequency in each mutant was normalized to WT frequency. Of 3281 mutants screened, those displaying  $\geq 70\%$  decrease of BacFlash frequency were selected for the second-round screening.

(b) Results for BacFlash frequency in the second-round screening. The BacFlash frequency in each mutant was normalized to WT frequency. Of 128 mutants from the first-round screening, those displaying  $\geq 50\%$  decrease (red bars) were selected for the third-round screening.

The data are mean values.  $n = 2 - 6$  image stacks for each group.
