# Supplementary material
Source: PubMed Central journal article supplement (PMC8169942)
Supplement: 41422_2020_431_MOESM14_ESM.pdf [file 41422_2020_431_MOESM14_ESM.pdf]

## Figure S14

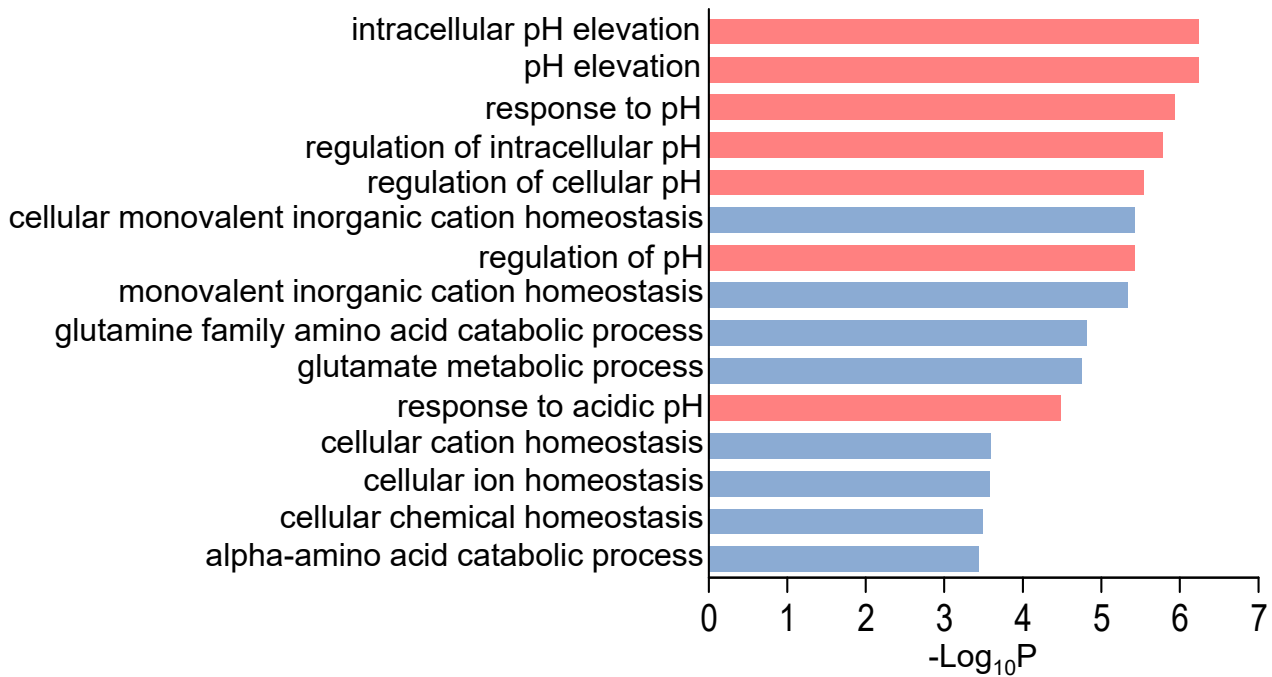

### Figure S14. Bioinformatic analysis of the up-regulated genes using KOBAS3.0.

RNA-seq analysis was performed in BW25113 cells under conditions of high and low BacFlash activity. The genes upregulated by  $\geq 5$  folds were analyzed. Note that pH response pathways (marked in red) were highly enriched.
