# Supplementary material
Source: PubMed Central journal article supplement (PMC8169942)
Supplement: 41422_2020_431_MOESM15_ESM.pdf [file 41422_2020_431_MOESM15_ESM.pdf]

## Figure S15

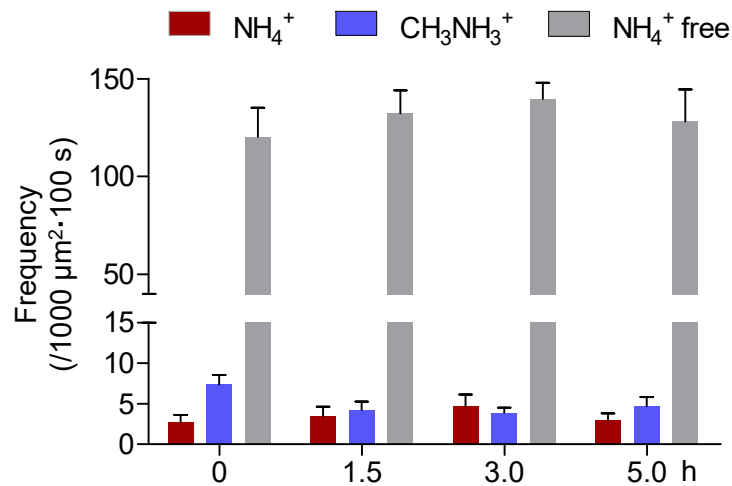

### Figure S15. Persistent hyperactivity of BacFlashes in the absence of ammonium.

The wild type BW25113 *E. coli* cells were in M9 minimal medium containing 20 mM ammonium (NH<sub>4</sub><sup>+</sup>) or 20 mM methylammonium (CH<sub>3</sub>NH<sub>3</sub><sup>+</sup>) or in ammonium-free M9 minimal medium (NH<sub>4</sub><sup>+</sup> free) for different time. Data are mean  $\pm$  sem. n = 6 - 18 image stacks per group.
