# Supplementary material
Source: PubMed Central journal article supplement (PMC8169942)
Supplement: 41422_2020_431_MOESM16_ESM.pdf [file 41422_2020_431_MOESM16_ESM.pdf]

## Figure S16

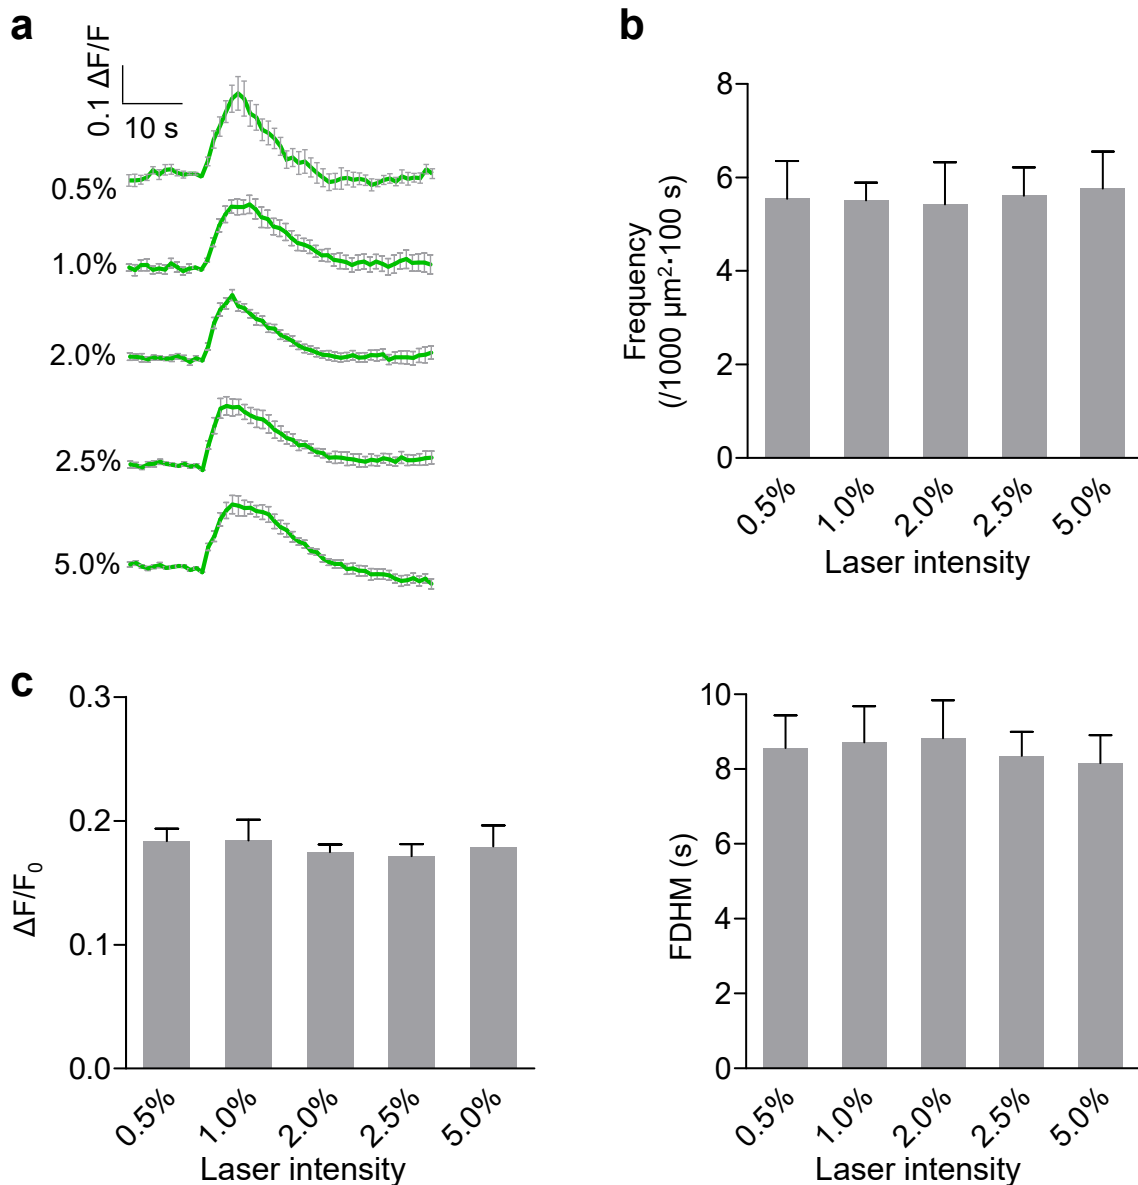

### Figure S16. BacFlashes are insensitive to laser illumination.

(a) Averaged traces of BacFlashes under different laser intensity.  $n = 9 - 17$  events per group. Note that  $> 5.0\%$  laser intensity caused severe photobleaching of pHluorin fluorescence in our image protocol.

(b) BacFlash frequency under different laser intensity. Data are mean  $\pm$  sem.  $n = 5 - 7$  image stacks per group.

(c) Properties of BacFlashes under different laser intensity.  $\Delta F/F_0$ , amplitude expressed as peak increase of fluorescence normalized by basal fluorescence signal  $F_0$ ; FDHM, full duration at half maximum. Data are mean  $\pm$  sem.  $n = 9 - 17$  events from 5-7 image stacks per group.
