# Supplementary material
Source: PubMed Central journal article supplement (PMC8169942)
Supplement: 41422_2020_431_MOESM19_ESM.pdf [file 41422_2020_431_MOESM19_ESM.pdf]

**Table S3. Promoter regions**

| Promoter fragments <sup>a</sup> |                    |                  |
|---------------------------------|--------------------|------------------|
| Name                            | Start <sup>b</sup> | End <sup>b</sup> |
| hdeAp                           | -323               | 69               |
| hdeDp                           | -363               | 237              |
| gadAp                           | -288               | 273              |
| gadBp                           | -553               | 273              |
| gadEp                           | -868               | 94               |

<sup>a</sup>Promoter fragments are PCR-amplified regions of *E. coli* MG1655 genomic DNA expected to contain a promoter.

<sup>b</sup>The start and end coordinates are relative to the ATG of the gene in the promoter fragment name.
