# Supplementary material
Source: PubMed Central journal article supplement (PMC8169942)
Supplement: 41422_2020_431_MOESM23_ESM.pdf [file 41422_2020_431_MOESM23_ESM.pdf]

**Supplementary Video S1** BacFlashes in BW25113 cells in M9 minimal medium containing 20 mM ammonium. Scale bar: 2  $\mu\text{m}$ .

**Supplementary Video S2** BacFlash in filamentous BW25113 cells in ammonium-free M9 minimal medium. Scale bar: 5  $\mu\text{m}$ .

**Supplementary Video S3** BacFlashes in BW25113 cells in ammonium-free M9 minimal medium. Scale bar: 2  $\mu\text{m}$ .
